# Supplementary material for: On the Comparison of Records from Standard and Engineered Fiber Optic Cables at Etna Volcano (Italy)
Source: MDPI journal article supplement (doi:10.3390/s23073735), 2023-04-04
Supplement: s1 [file s1]

# On the comparison of records from Standard and Engineered fiber optic cables at Etna volcano (Italy)

Supplementary Material

April 1, 2023

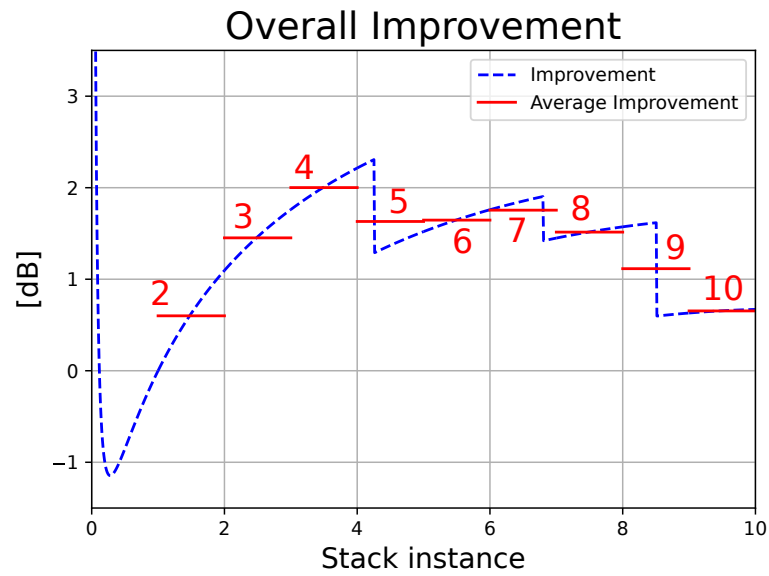

Figure 1: Overall Improvement curve in dashed blue from formula derived in Appendix. Red lines represents the values of the Overall Average Improvement for the specified fiber instance. Calculations were done for a fixed sampling frequency of 1 kHz.

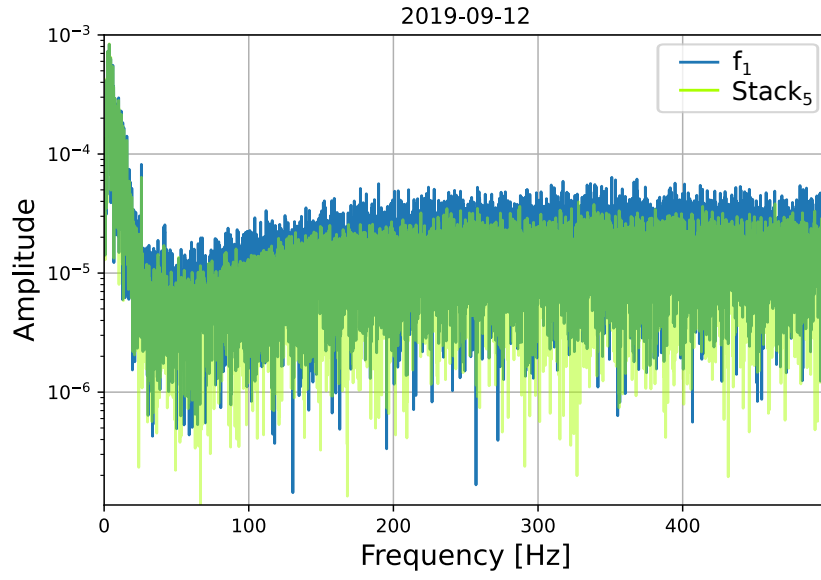

Figure 2: Spectrum of stack instance 5 of standard fiber and fiber instance 1 in green and blue curves, respectively.

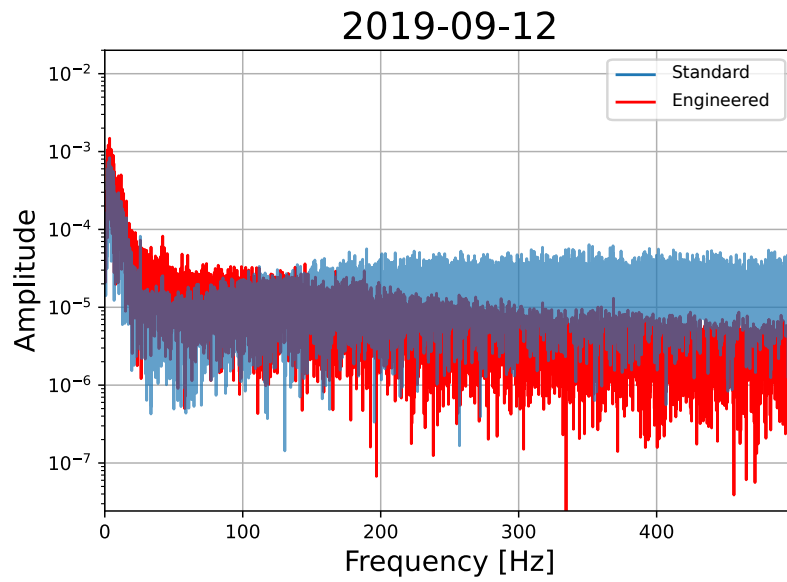

Figure 3: Spectrum of standard fiber (fiber instance 1) and engineered fiber in blue and red curves, respectively.

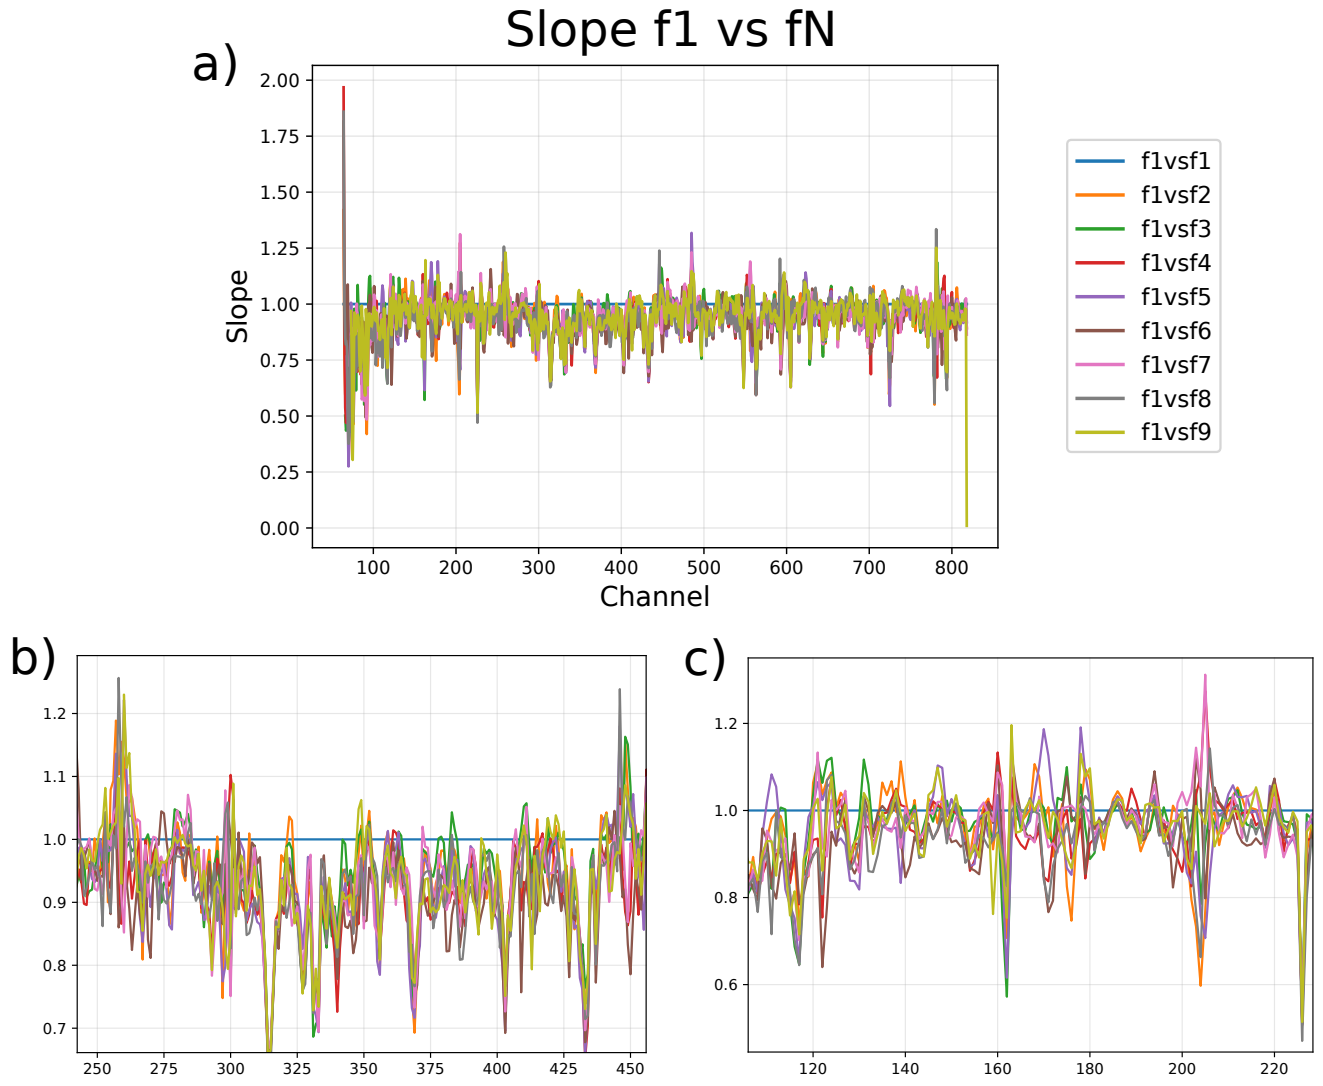

Figure 4: Slope between fiber instance 1 against the stack instances across all channels. Reduction of amplitude is shown as the overall slope is reduced below 1. **a)** is the general view across all channels, while **b)** and **c)** are zoomed sections.

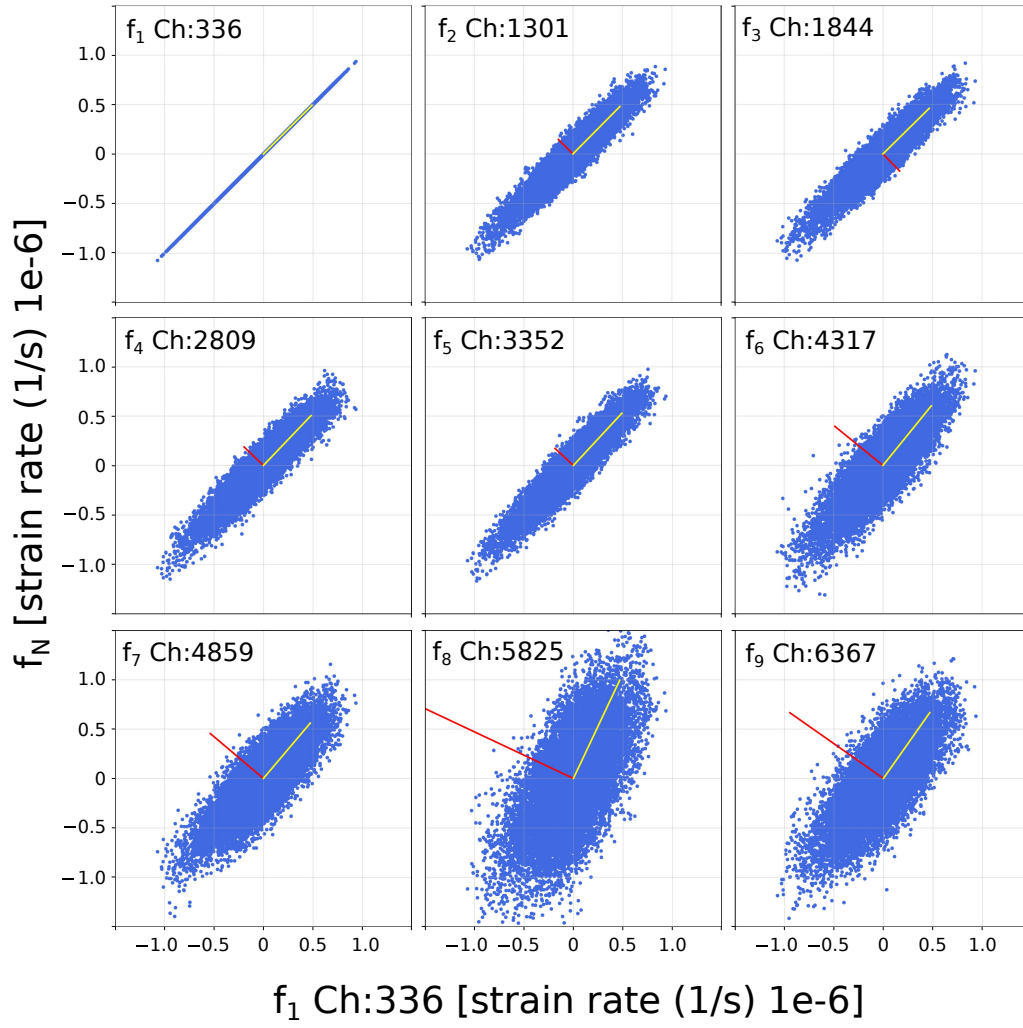

Figure 5: Strain-rate cross-plots in lowpass filter between the standard fiber instance 1 and other fiber instances amplitudes using the equivalence of channels 336 (Standard) to the other ones indicated on each fiber instance. Yellow and red lines indicates the direction of the eigenvectors  $\vec{e}_1$  and  $\vec{e}_2$  for the specific fiber 1 instance vs. the other instances amplitude comparison, respectively.



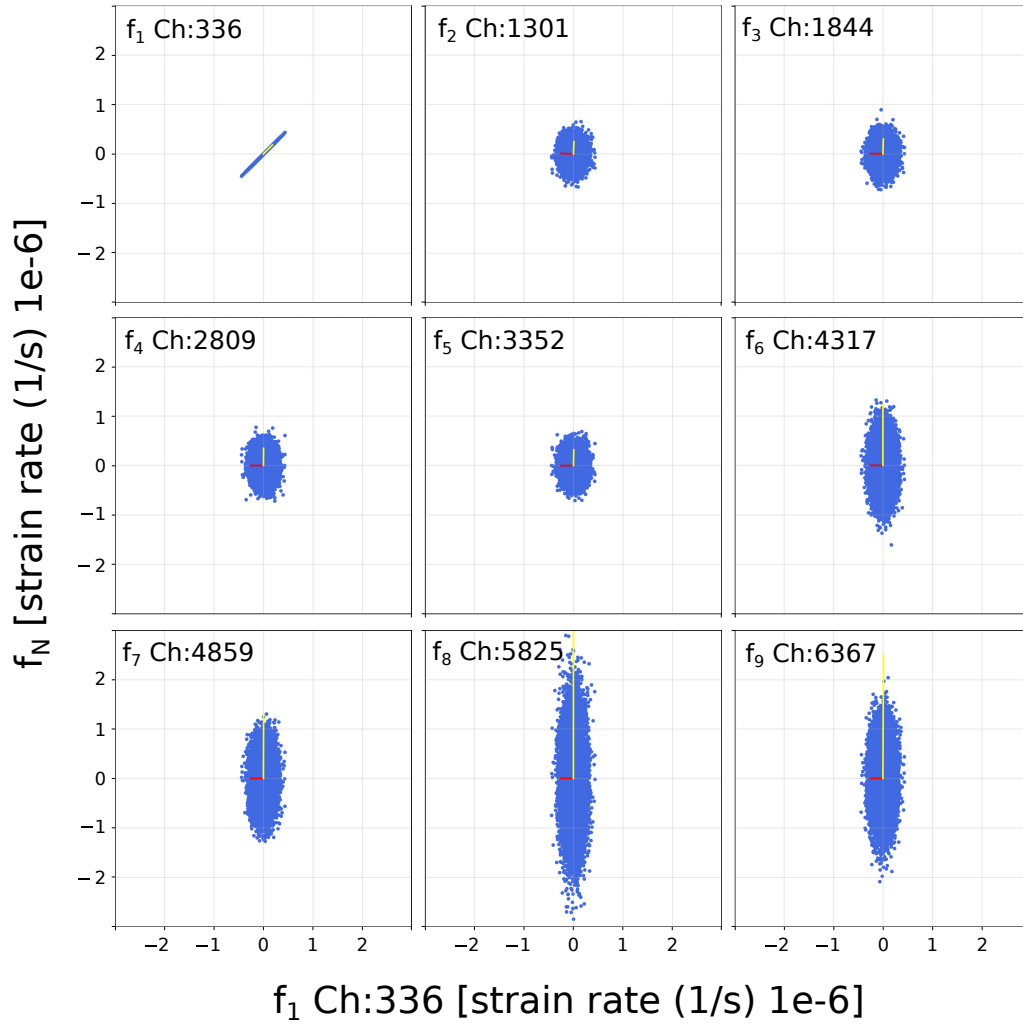

Figure 6: Strain-rate cross-plots in highpass filter between the standard fiber instance 1 and other fiber instances amplitudes using the equivalence of channels 336 (Standard) to the other ones indicated on each fiber instance. Yellow and red lines indicates the direction of the eigenvectors  $\vec{e}_1$  and  $\vec{e}_2$  for the specific fiber 1 instance vs. the other instances amplitude comparison, respectively.

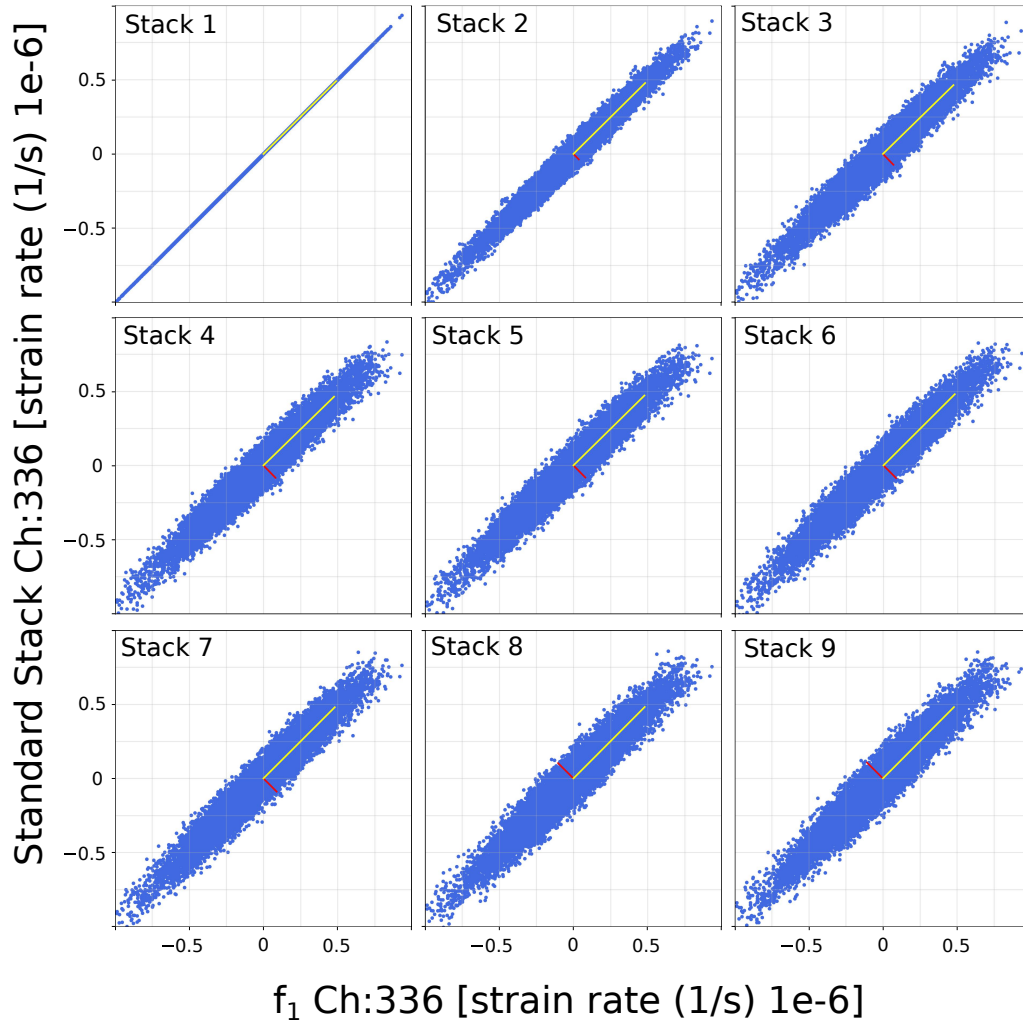

Figure 7: Strain-rate cross-plots in lowpass filter between the standard fiber instance 1 and stack instances amplitudes using channel 336. Yellow and red lines indicates the direction of the eigenvectors  $\vec{e}_1$  and  $\vec{e}_2$  for the specific fiber 1 instance vs. the other instances amplitude comparison, respectively.

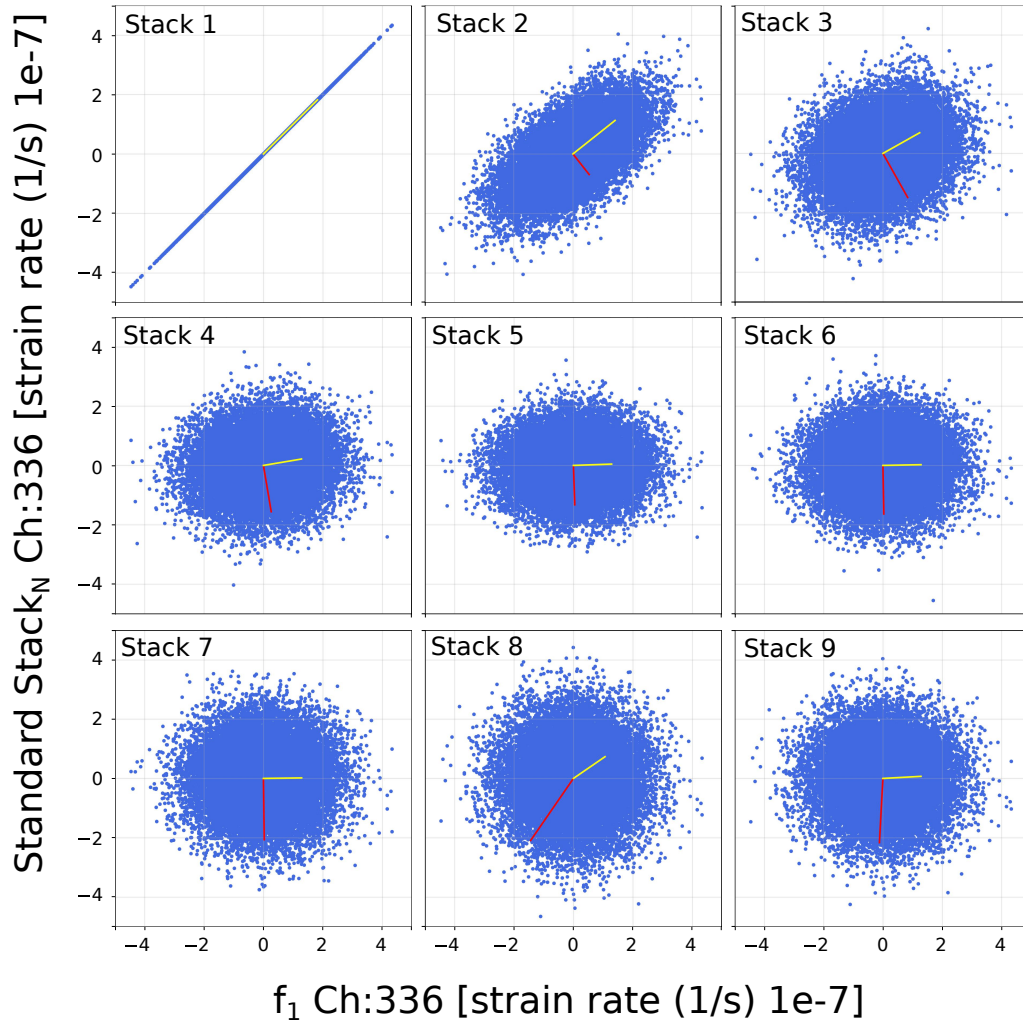

Figure 8: Strain-rate cross-plots in highpass filter between the standard fiber instance 1 and stack instances amplitudes using channel 336. Yellow and red lines indicates the direction of the eigenvectors  $\vec{e}_1$  and  $\vec{e}_2$  for the specific fiber 1 instance vs. the other instances amplitude comparison, respectively.

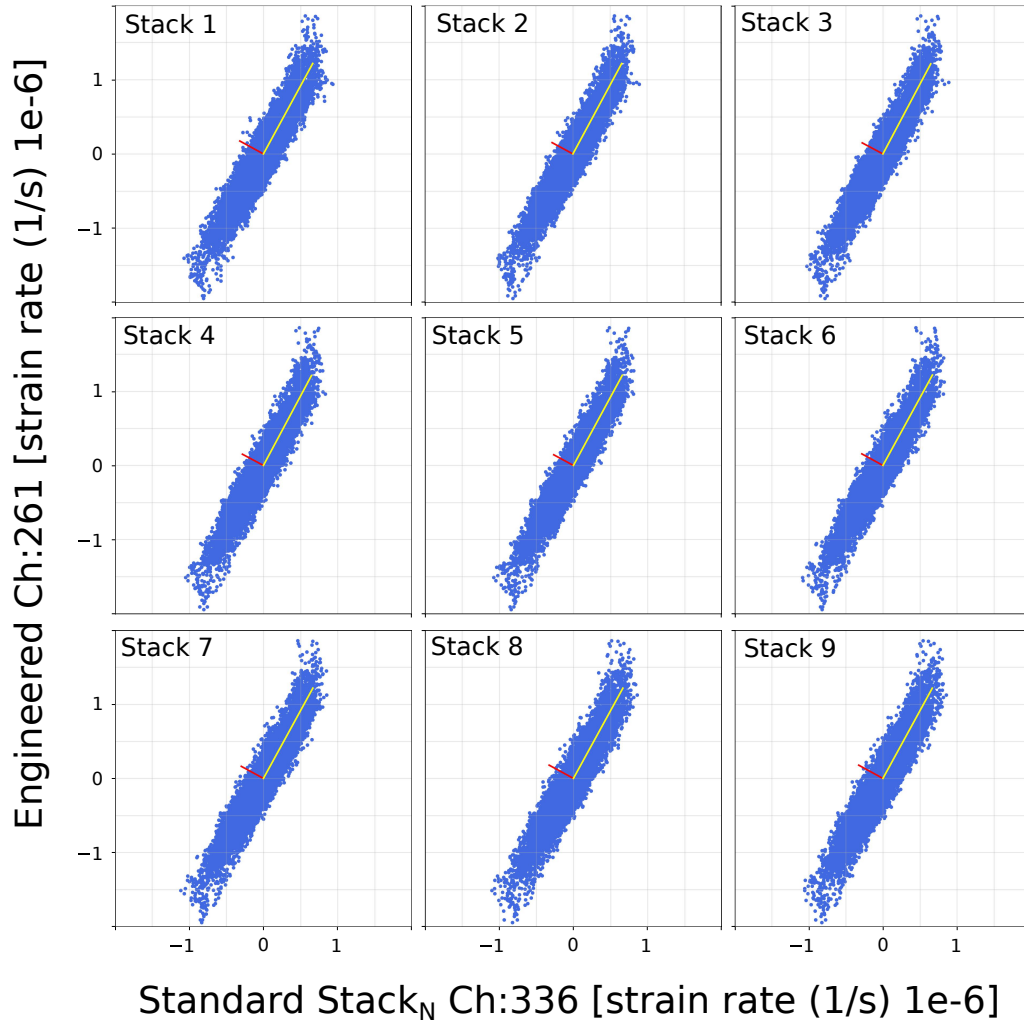

Figure 9: Strain-rate cross-plots in lowpass filter between the standard stack instances and engineered amplitudes using equivalent channels 336 and 261 for standard and engineered fiber, respectively. Yellow and red lines indicates the direction of the eigenvectors  $\vec{e}_1$  and  $\vec{e}_2$  for the specific fiber 1 instance vs. the other instances amplitude comparison, respectively.

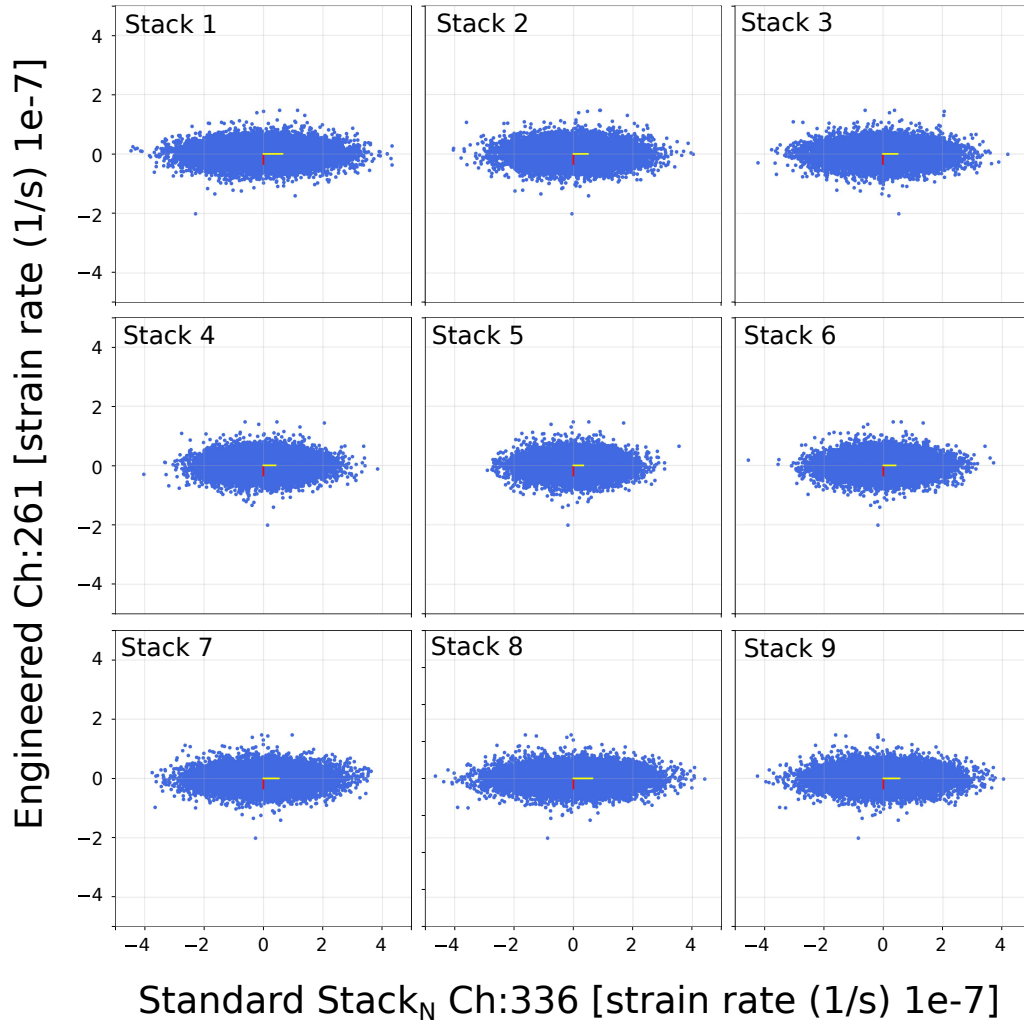

Figure 10: Strain-rate cross-plots in highpass filter between the standard stack instances and engineered amplitudes using equivalent channels 336 and 261 for standard and engineered fiber, respectively. Yellow and red lines indicates the direction of the eigenvectors  $\vec{e}_1$  and  $\vec{e}_2$  for the specific fiber 1 instance vs. the other instances amplitude comparison, respectively.

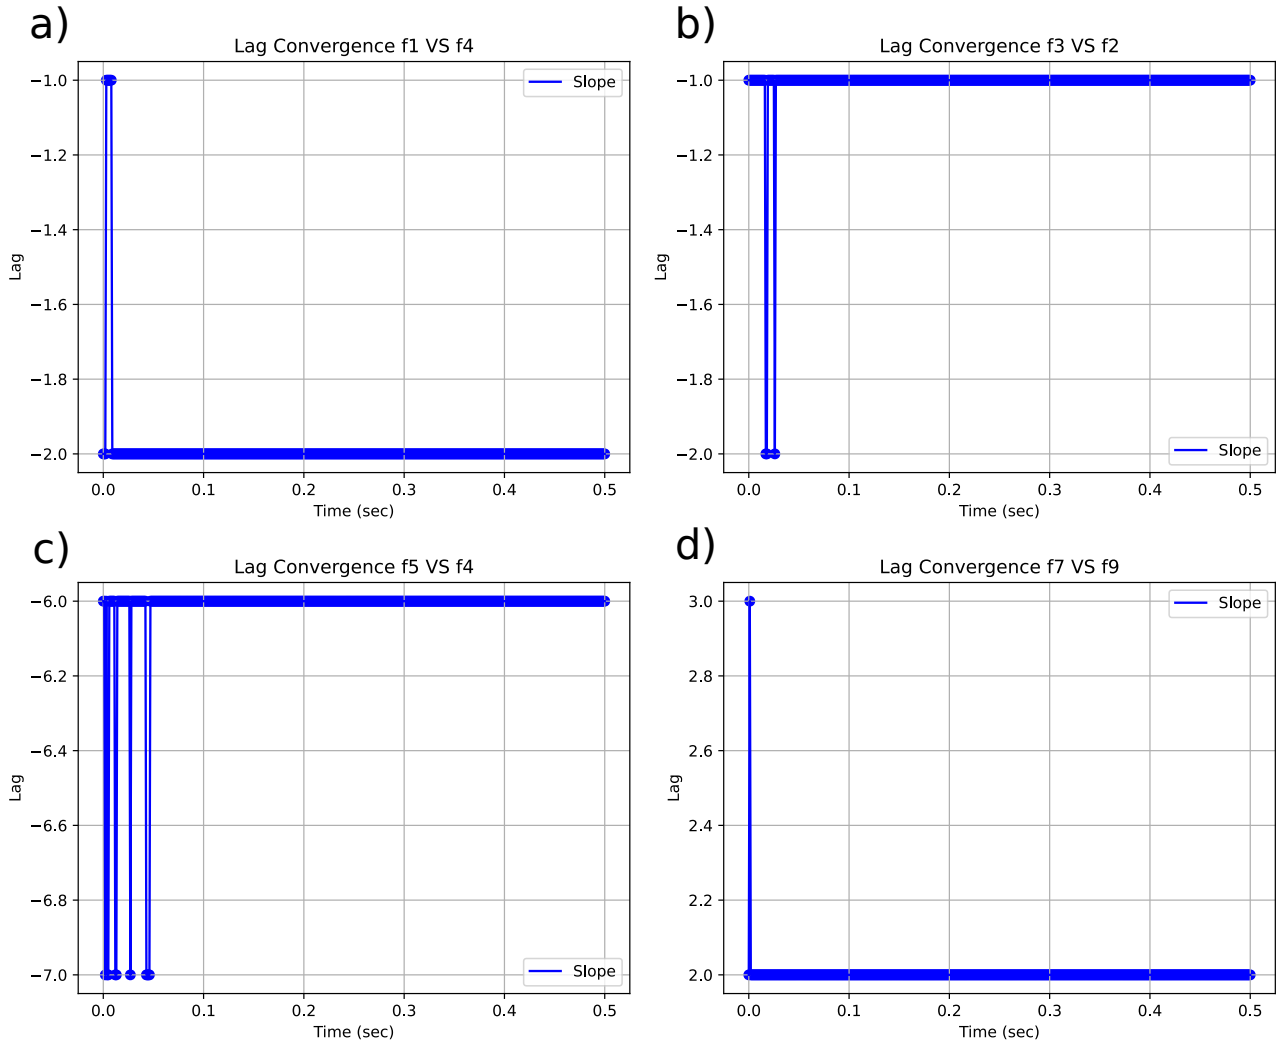

Figure 11: Spatial CC convergence over time-sample included in the Spatial CC for fiber instances pairs. Only 4 random examples are included which are: **a)** fiber instances 1 and 4, **b)** fiber instances 3 and 2, **c)** fiber instances 5 and 4, **d)** fiber instances 7 and 9.

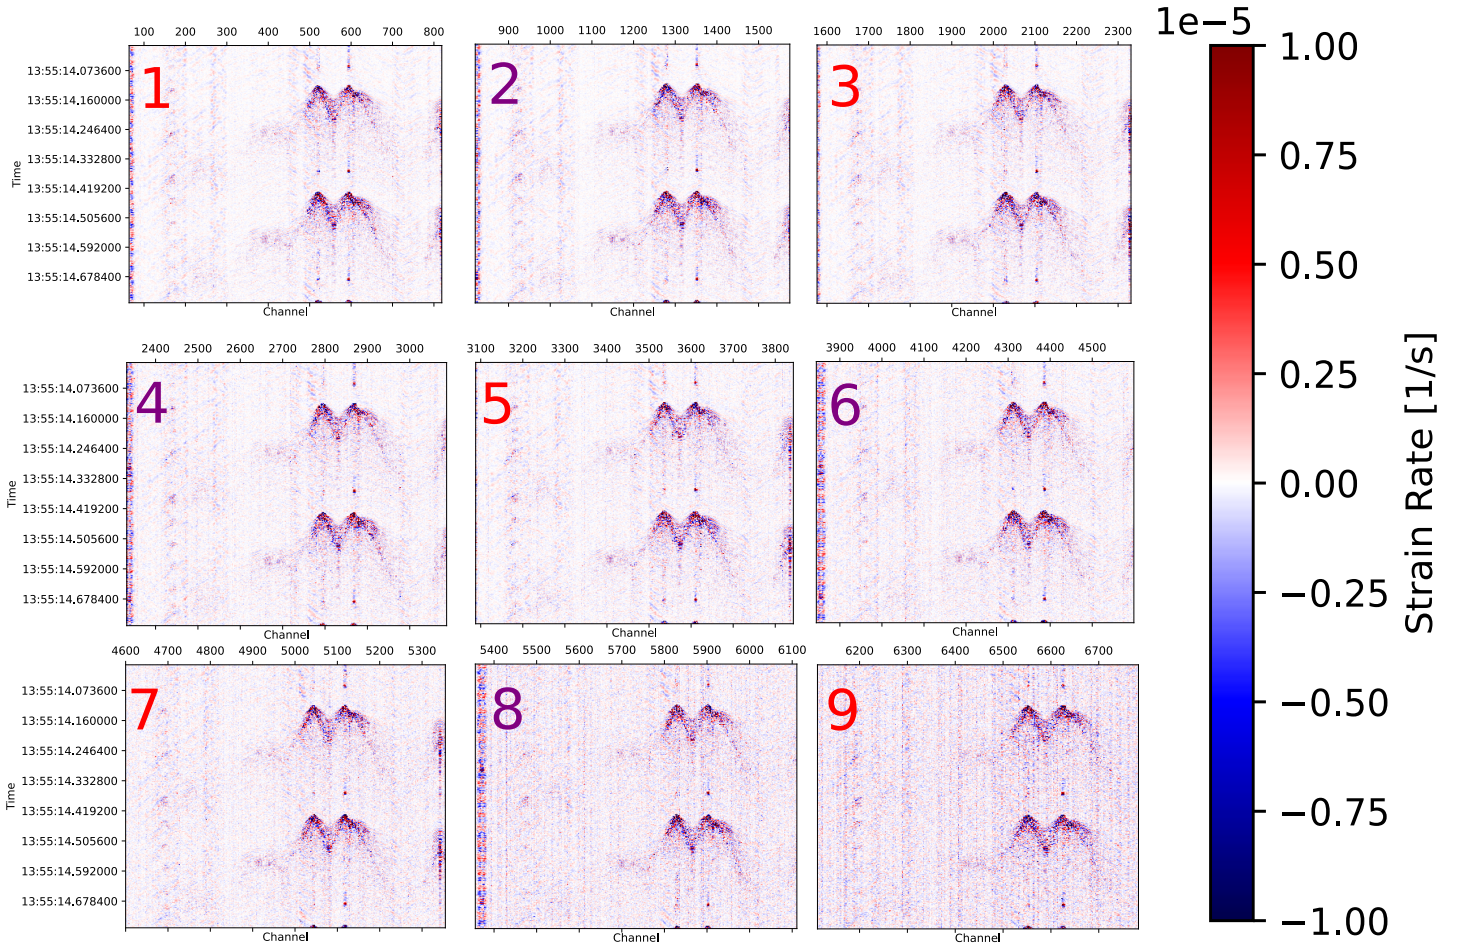

Figure 12: Windows of Standard fiber instances from Figure 3 in the main text. The purple numbers in the upper-left part of the windows indicate the windows that were reflected for the Spatial CC (and show reflected here) while the red numbers indicate windows in the original orientation (unaffected).



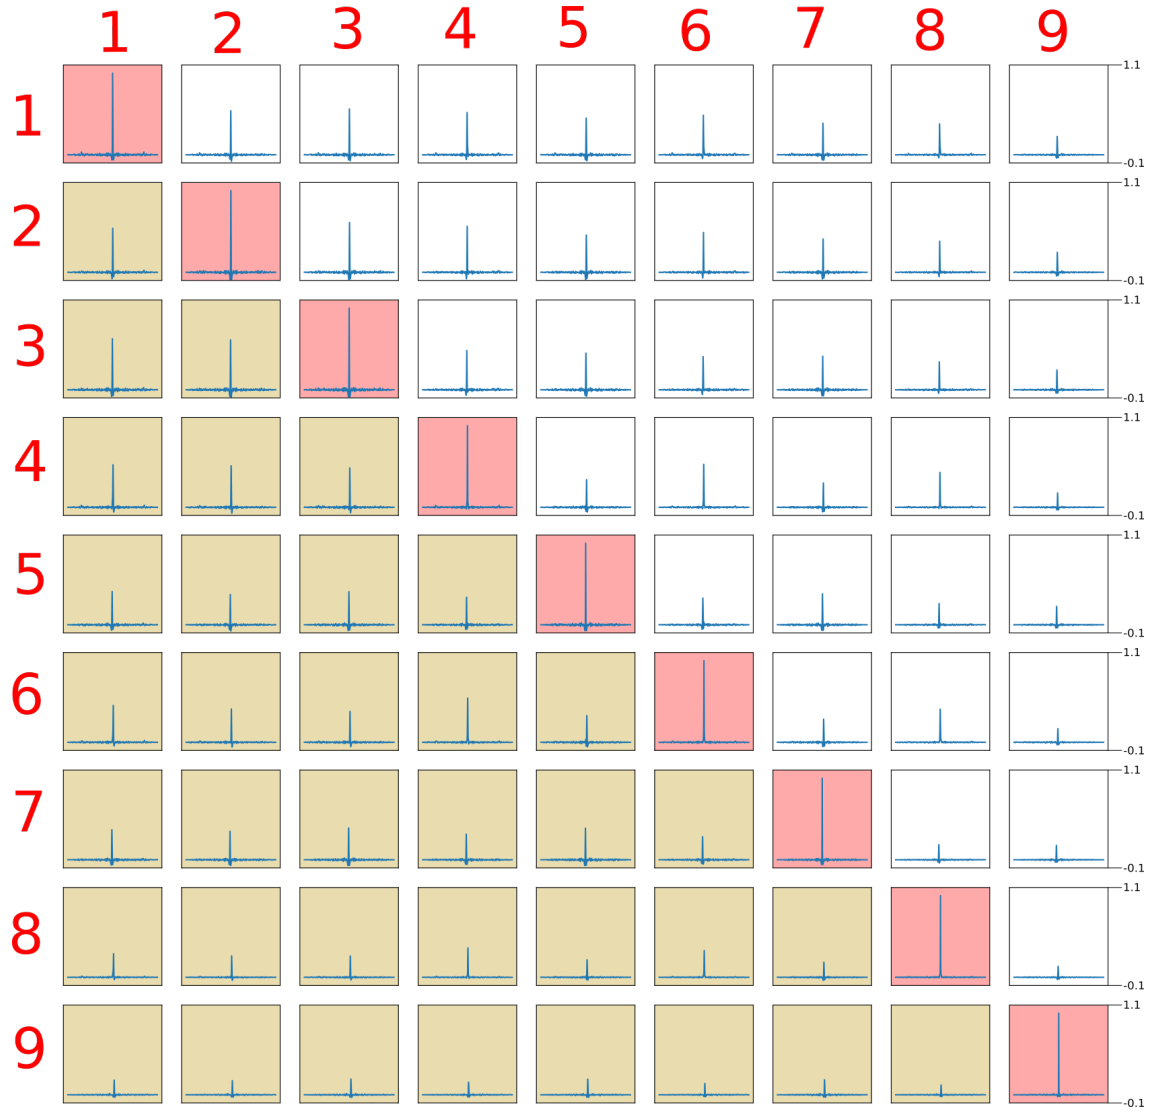

Figure 13: Visualization of Spatial CC functions achieved for fiber instance pairs. Red numbers indexes indicate the fiber instance number of the CC matrix. Plots with red background are auto-correlations (diagonal components) and light brown are the reflected CC functions of the white areas.



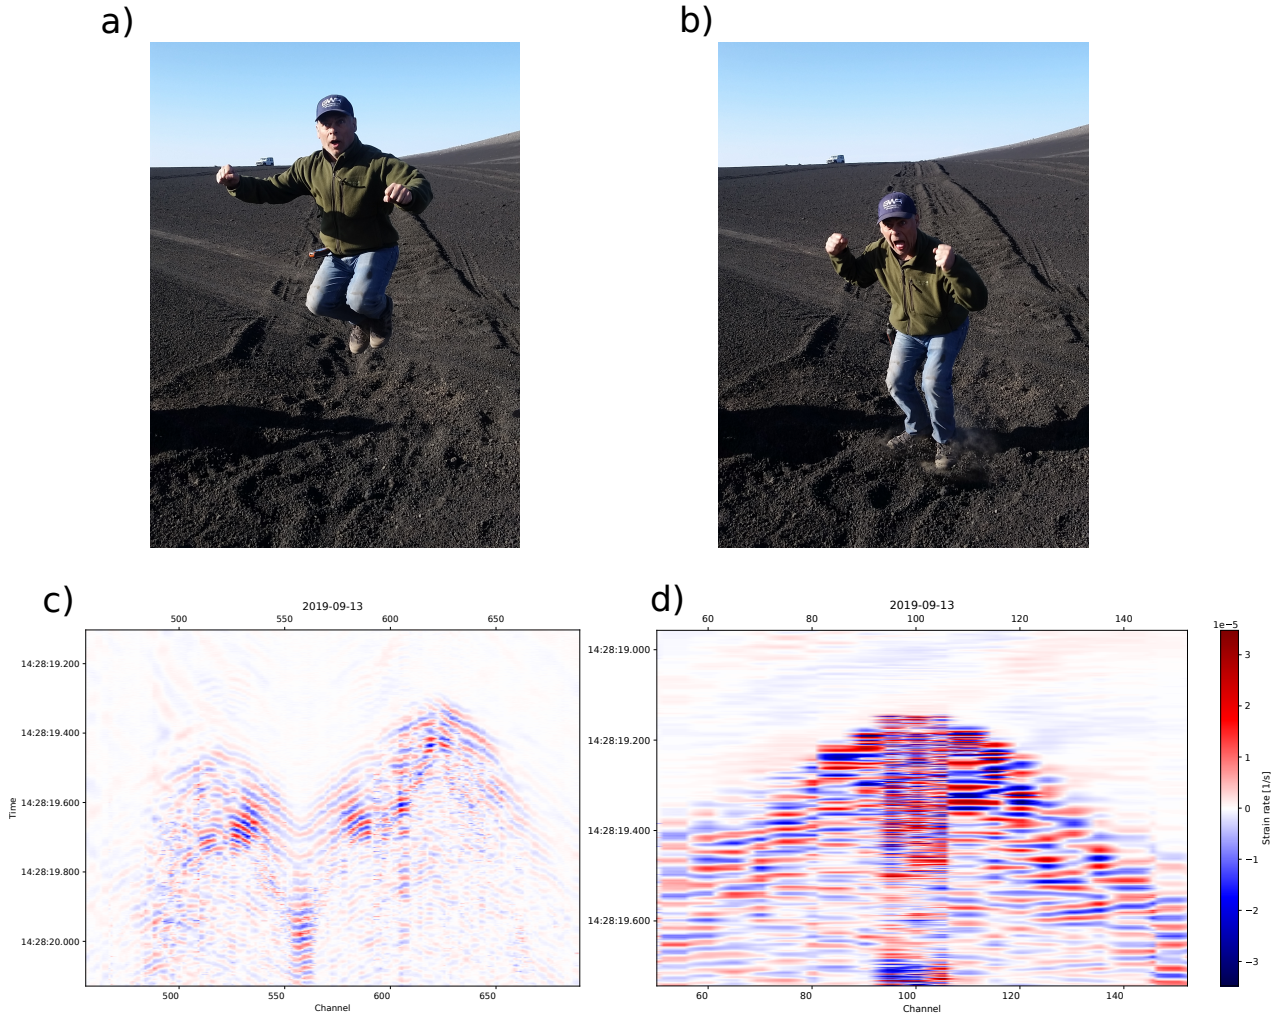

Figure 14: Example of a tap test (JJ29, see Table 2) as **a)** jumping above the ground and **b)** landing back. Subfigures **c)** and **d)** show the recorded tap in standard and engineered fibers, respectively. Tap location was near engineered fiber, but far from standard fiber. Standard cable crosses perpendicularly 2 times the direction of the engineered fiber, and so 2 records of the tap test are seen with a time delay for 2 ranges of channels.

| Variable                        | iDAS (standard fiber) | Carina (engineered fiber) |
|---------------------------------|-----------------------|---------------------------|
| Sampling Frequency[Hz]          | 1000.0                | 1000.0                    |
| Spatial Resolution[m]           | 2.0                   | 1.0                       |
| Start Position[m]               | 167.2742              | 412.0                     |
| Measure Length[m]               | 13824                 | 576                       |
| Stream Time[s]                  | inf                   | inf                       |
| Continuous Mode                 | True                  | True                      |
| Source Mode                     | Normal                | Normal                    |
| Power Decrement                 | 0.0                   | 0.0                       |
| Start Distance (m)              | -124.020952           | 1549.805719               |
| Stop Distance (m)               | 13987.6248            | 2136.85334                |
| Precise Sampling Frequency (Hz) | 5000.0                | 16000.0                   |
| Peak Voltage[V]                 | 2.0                   | 2.0                       |
| Pulse 2 Delay (ns)              | 500.0                 | 40.0                      |

|                          |                               |                               |
|--------------------------|-------------------------------|-------------------------------|
| Pulse Width [ns]         | 50.0                          | 140.0                         |
| OffsetLength             | 64.0                          | 64.0                          |
| PreTrig Samples          | 94                            | 64                            |
| Reference length         | 0                             | 1                             |
| Saving Bandwidth (MB/s)  | 350.0                         | 350.0                         |
| Reference Level 1        | 65535                         | 65535                         |
| Reference Level 2        | 50631                         | 52385                         |
| Reference Level 3        | 50215                         | 58016                         |
| Fibre Index              | 1.4682                        | 1.4682                        |
| Fibre Length Multiplier  | 1.0209523838714072            | 1.0209523838714072            |
| Unit Calibration (nm)    | 116.0                         | 116.0                         |
| Diff Amplify Factor      | 0                             | 0                             |
| Attenuator 2             | 2.31502                       | 2.070873                      |
| Fibre Length per Metre   | 1.0                           | 1.0                           |
| Zero Offset (m)          | -124.02095                    | 1549.805719                   |
| Receiver Gain            | 147.00 147.00 147.00          | 0 0 0                         |
| Pulse Width 2 (ns)       | 50.0                          | 40.0                          |
| Peak Voltage 2 (V)       | 0.0                           | 0.0                           |
| Tags                     | NA                            | NA                            |
| Gauge Length             | 10.0                          | 10.209523838714073            |
| Attenuator 1             | 0.0                           | 2.206218                      |
| Time Decimation          | 5                             | 16                            |
| Output Decimation [bool] | 2                             | 2                             |
| P                        | 5                             | 11                            |
| P Coefficients           | 1.0 x 5                       | 1.0 x 11                      |
| Integration Cut Off (Hz) | 3.14                          | 3.14                          |
| Normalization            | True                          | True                          |
| Decimation Filter        | True                          | True                          |
| Acoustic Output          | Differential                  | Differential                  |
| Diagnostic Output        | R, S, As & dP                 | R, S, As & dP                 |
| Window                   | 0                             | 0                             |
| GPS TimeStamp            | 2019-09-12T11:56:06.859969    | 2019-09-11T04:24:28.340626    |
| Defragmented             | False                         | False                         |
| CPU TimeStamp            | 2019-09-12T12:56:06.859+01:00 | 2019-09-11T04:25:02.156365    |
| iDAS Version             | 2.4.1.102                     | 2.5.0.88                      |
| iDAS ClockSource         | AA Onboard PLL                | AA Onboard PLL                |
| ISO8601 Timestamp        | 2019-09-12T12:56:06.859+01:00 | 2019-09-11T04:24:28.340+00:00 |

Table 1: Metadata variables for the survey done with iDAS and Carina units. The 2 metadatas correspond to the first files generated for each survey. No change is expected since adquisition was continuous.

| Tap ID   | Time (UTC) | Latitude  | Longitude | lat N (UTM) | lon E (UTM) | Altitude (m.a.s.l) | Channel Standard | Channel Engineered |
|----------|------------|-----------|-----------|-------------|-------------|--------------------|------------------|--------------------|
| JJ01     | 10:51:21   | 37.766485 | 15.0156   | 4179906.675 | 501373.97   | 2799.065           | 134              | NA                 |
| JJ02     | 10:53:33   | 37.766276 | 15.015213 | 4179883.482 | 501339.889  | 2791.252           | 155              | NA                 |
| JJ03     | 10:56:32   | 37.766363 | 15.014783 | 4179893.128 | 501302.015  | 2788.954           | 174              | NA                 |
| JJ04     | 10:59:15   | 37.76641  | 15.01433  | 4179898.336 | 501262.116  | 2798               | 194              | NA                 |
| JJ05     | 11:01:54   | 37.766502 | 15.01378  | 4179908.536 | 501213.673  | 2791.259           | 219              | 497                |
| JJ06     | 11:06:30   | 37.766645 | 15.012942 | 4179924.391 | 501139.864  | 2793.577           | 255              | 423                |
| JJ07     | 11:11:43   | 37.76677  | 15.012175 | 4179938.251 | 501072.309  | 2795.34            | 290              | 355                |
| JJ08     | 11:16:00   | 37.766808 | 15.011948 | 4179942.464 | 501052.315  | 2795.259           | 300              | 335                |
| JJ09     | 11:19:09   | 37.766648 | 15.01185  | 4179924.711 | 501043.686  | 2796.014           | 312              | 316                |
| JJ10     | 11:23:43   | 37.766133 | 15.011581 | 4179867.57  | 501020.001  | 2796.757           | 342              | 256                |
| JJ11     | 13:45:38   | 37.76548  | 15.011324 | 4179795.119 | 500997.375  | 2798.106           | 380              | 182                |
| JJ15     | 13:50:44   | 37.764345 | 15.0108   | 4179669.188 | 500951.237  | 2804.156           | 448              | NA                 |
| JJ19     | 13:55:13   | 37.764803 | 15.012357 | 4179720.019 | 501088.367  | 2794.821           | 521              | NA                 |
| J14 july | 14:00:05   | 37.76492  | 15.01272  | 4179733     | 501120.34   | 2797               | 537              | 45                 |
| J15 july | 14:01:43   | 37.76503  | 15.01311  | 4179745.21  | 501154.69   | 2795               | 560              | NA                 |
| JJ20     | 14:05:43   | 37.764828 | 15.012165 | 4179722.79  | 501071.456  | 2795.611           | 606              | NA                 |
| JJ21     | 14:07:49   | 37.765152 | 15.012586 | 4179758.742 | 501108.532  | 2794.248           | 631              | 66                 |
| JJ22     | 14:10:56   | 37.765763 | 15.013643 | 4179826.544 | 501201.619  | 2793.034           | 688              | NA                 |
| JJ24     | 14:13:32   | 37.766213 | 15.014338 | 4179876.48  | 501262.824  | 2791.077           | 726              | NA                 |
| JJ25     | 14:16:40   | 37.765261 | 15.013874 | 4179770.852 | 501221.973  | 2791.612           | 780              | NA                 |
| JJ27     | 14:19:47   | 37.765102 | 15.013414 | 4179753.205 | 501181.46   | 2794.656           | 804              | NA                 |
| JJ28     | 14:22:38   | 37.76507  | 15.013143 | 4179749.651 | 501157.592  | 2796.251           | 818              | NA                 |
| JJ29     | 14:28:17   | 37.765256 | 15.012211 | 4179770.276 | 501075.502  | 2800.418           | 622              | 100                |

Table 2: GPS measurements of the tap tests carried out along the path of the Standard and Constellation cables.

| Fibre Type | Fibre instance | Channel No. |
|------------|----------------|-------------|
| Standard   | 1              | 336         |
|            | 2              | 1301        |
|            | 3              | 1844        |
|            | 4              | 2809        |
|            | 5              | 3352        |
|            | 6              | 4317        |
|            | 7              | 4859        |
|            | 8              | 5825        |
|            | 9              | 6367        |
| Engineered | 1              | 261         |

Table 3: Equivalent channels between channel 261 in engineered fibre and the other standard fibre instances.
